# Supplementary material for: Differential Grainy head binding correlates with variation in chromatin structure and gene expression in Drosophila melanogaster
Source: Springer Nature journal article supplement (doi:10.1186/s12864-022-09082-7), 2022-12-27
Supplement: MOESM1 [file 12864_2022_9082_MOESM1_ESM.pdf]

| Cut&Run                           | Zhr_rep1 | Zhr_rep2 | Zhr_rep3 | Zhr_lgg  | Z30_rep1 | Z30_rep2 | Z30_rep3 | Z30_lgg  | ZhrZ30_hyb_rep1 | ZhrZ30_hyb_rep2 | ZhrZ30_hyb_rep3 | ZhrZ30_hyb_lgg |
|-----------------------------------|----------|----------|----------|----------|----------|----------|----------|----------|-----------------|-----------------|-----------------|----------------|
| Mapped read count                 | 31830054 | 75615531 | 93243324 | 75001085 | 45920087 | 78478336 | 92561058 | 98707783 | 99746460        | 99078988        | 72178151        | 95548121       |
| Allele-specific mapped read count | 7940182  | 17399400 | 23145532 | 17822737 | 11489309 | 19672055 | 22748894 | 23955654 | 22094835        | 23911405        | 18382991        | 23012723       |

| ATAC-seq                          | Zhr_rep1 | Zhr_rep2 | Zhr_rep3 | Z30_rep1 | Z30_rep2 | Z30_rep3 | ZhrZ30_hyb_rep1 | ZhrZ30_hyb_rep2 | ZhrZ30_hyb_rep3 |
|-----------------------------------|----------|----------|----------|----------|----------|----------|-----------------|-----------------|-----------------|
| Mapped read count                 | 41903438 | 22393174 | 51948002 | 8311594  | 33764542 | 10640158 | 55598232        | 52938501        | 48886537        |
| Allele-specific mapped read count | 10399221 | 5580341  | 12633291 | 2088122  | 8466205  | 2677190  | 13400192        | 13992394        | 11940212        |

| RNA-seq                           | Zhr_rep1 | Zhr_rep2 | Zhr_rep3 | Z30_rep1 | Z30_rep2 | Z30_rep3 | ZhrZ30_hyb_rep1 | ZhrZ30_hyb_rep2 | ZhrZ30_hyb_rep3 |
|-----------------------------------|----------|----------|----------|----------|----------|----------|-----------------|-----------------|-----------------|
| Mapped read count                 | 13145637 | 11813983 | 11428956 | 10343528 | 14645782 | 20046810 | 17827944        | 18093794        | 14342427        |
| Allele-specific mapped read count | 2601992  | 2332104  | 2271024  | 2070192  | 2912481  | 4023901  | 3509078         | 3617289         | 2899109         |

**Table S1. Mapped read counts for each sample before and after allele-specific filtering.** For all samples of Cut&Run, ATAC-seq, and RNA-seq libraries, counts of reads aligned via Bowtie2 to either the Zhr or Z30 genome before and after allele-specific filtering.

### Grh-Cut&Run

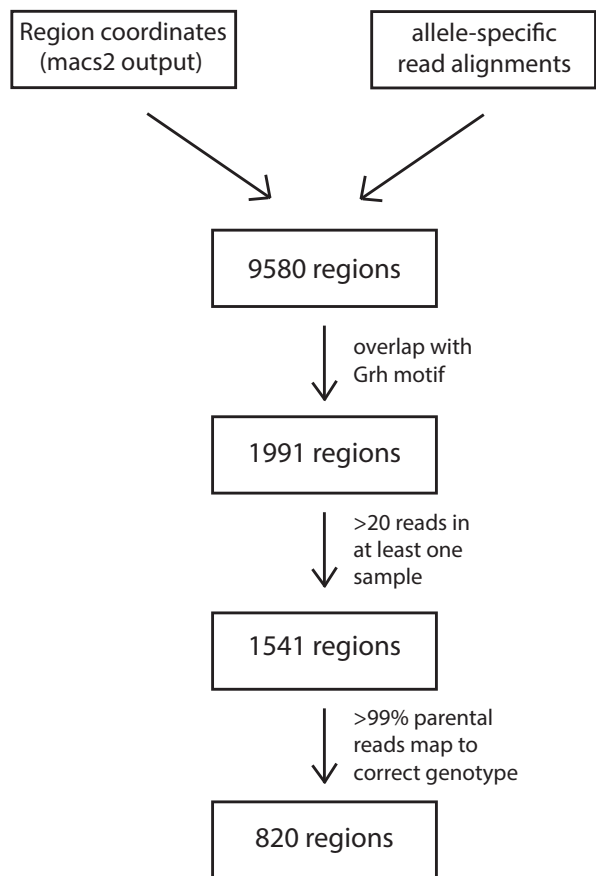

### ATAC-seq

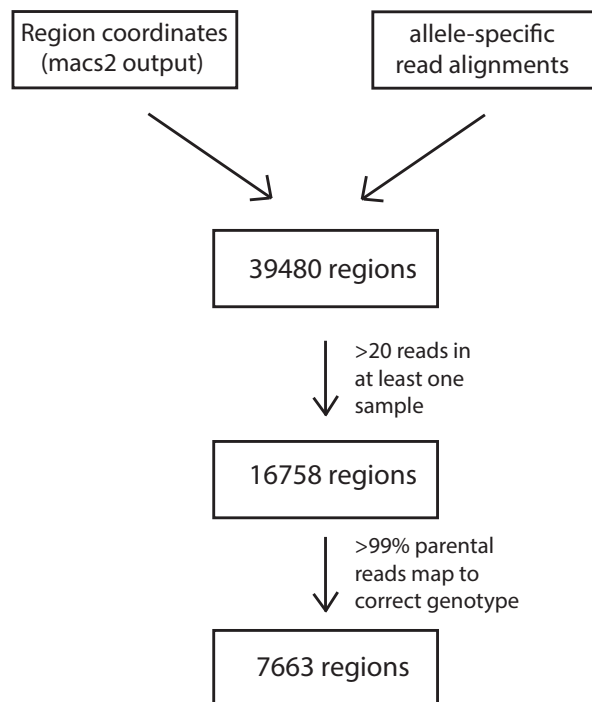

### RNA-seq

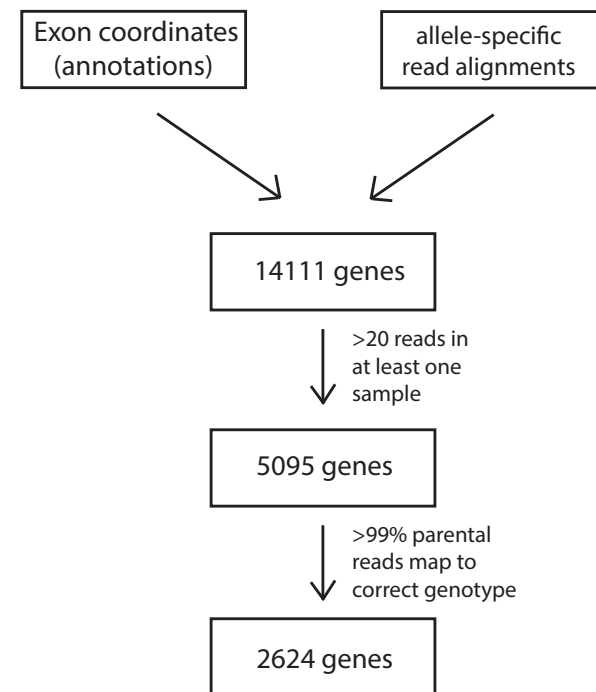

Figure S1. Flow chart for filtering regions and genes. A flowchart for each of the three datasets to show which filters were applied and how many regions/genes were filtered out at each step.

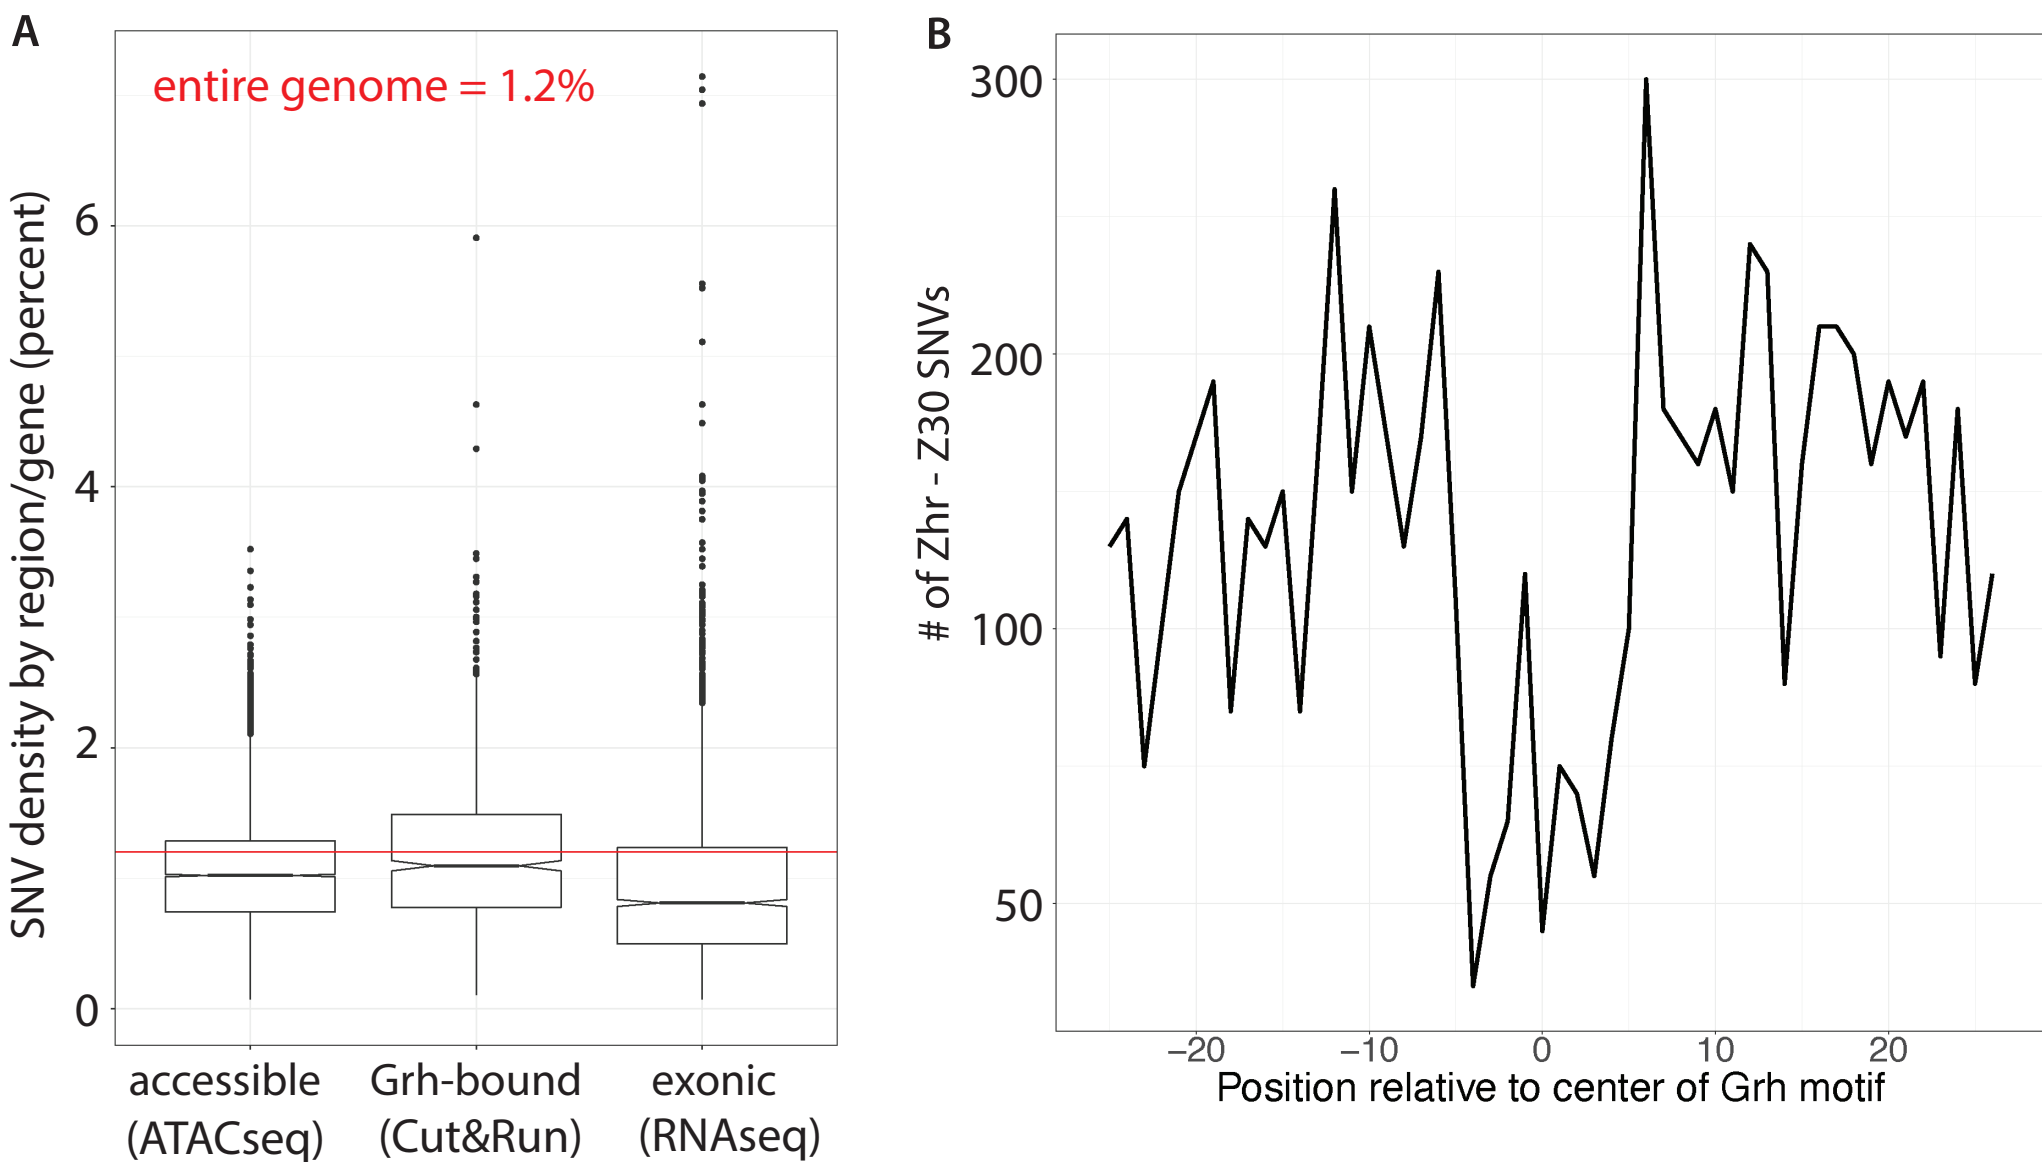

Figure S2. SNV characteristics across the genome and at Grh motifs. (A) Boxplots representing the distribution of SNV densities of each region (ATAC-seq and Cut&Run) or gene (RNA-seq) used for analyses. Notches represent the 95% confidence interval around the median. The red line represents the genome-wide percentage of SNVs. (B) Lineplot showing the number of SNVs at each Grh motif position (same as Figure 1B), as well as the surrounding 30bp for each focal Grh motif.

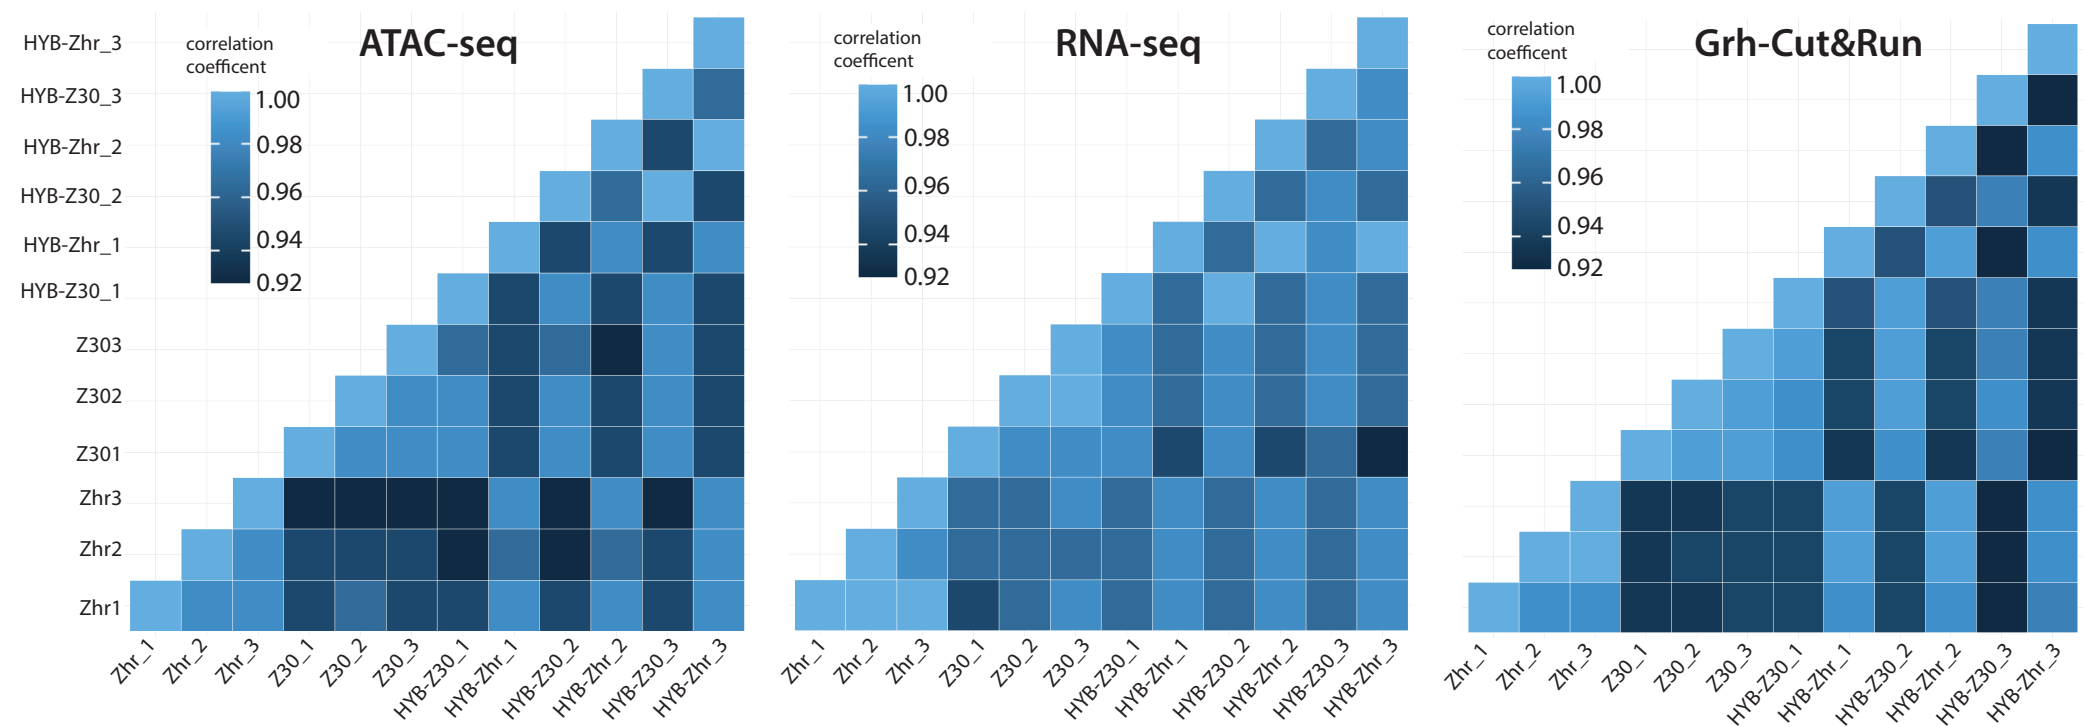

Figure S3. Correlation coefficients between samples. Pairwise Pearson's correlation coefficients between samples are represented as heatmaps for ATAC-seq (left), RNA-seq (middle), and Cut&Run (right). The values used for each sample are final, allele-specific CPM-transformed counts. The correlation coefficient value corresponds to the key, with lower values being blacker and higher values being bluer.

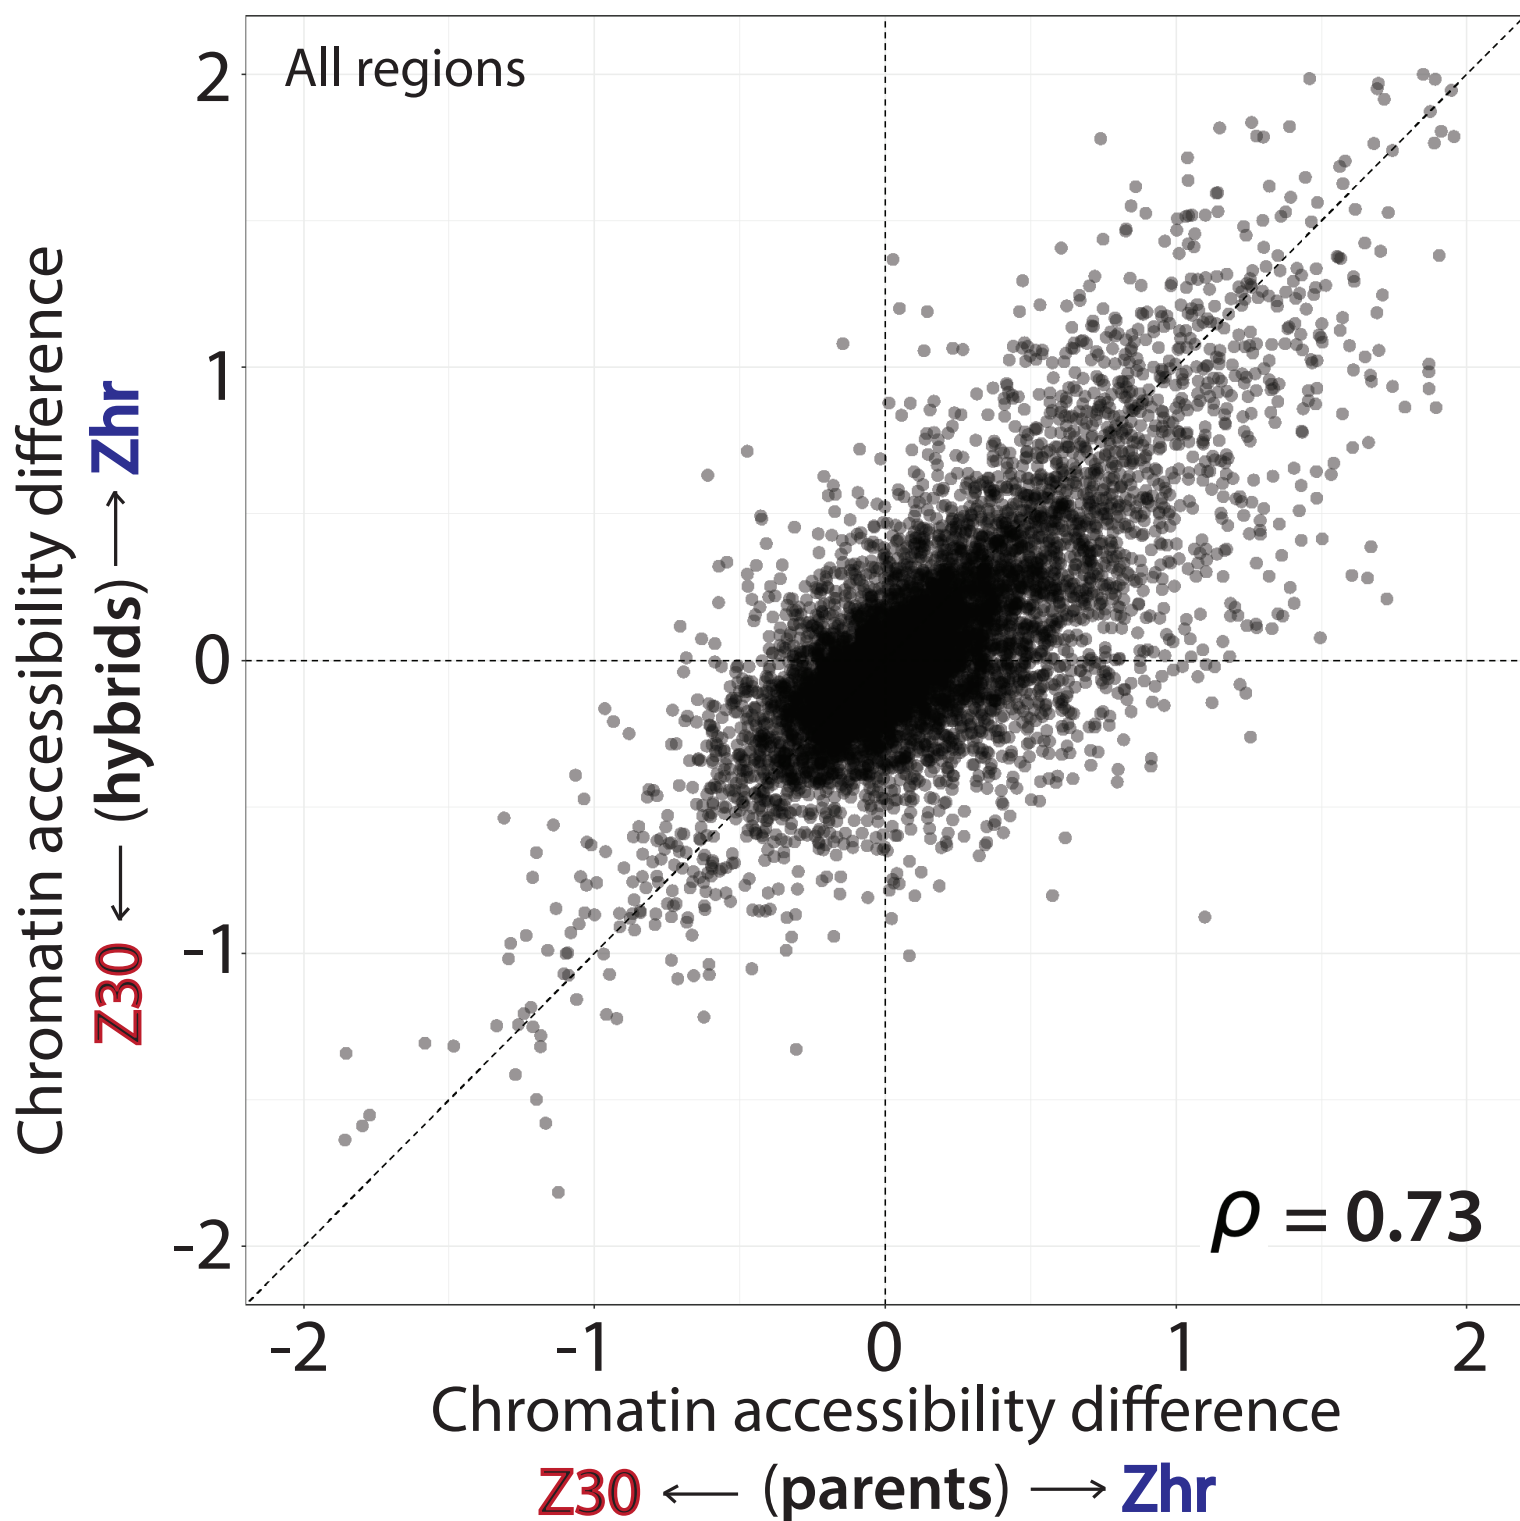

Figure S4. Chromatin accessibility features at Grh-bound regions. The same as Figure 4B but for all ATAC regions, instead of only those bound by Grh.

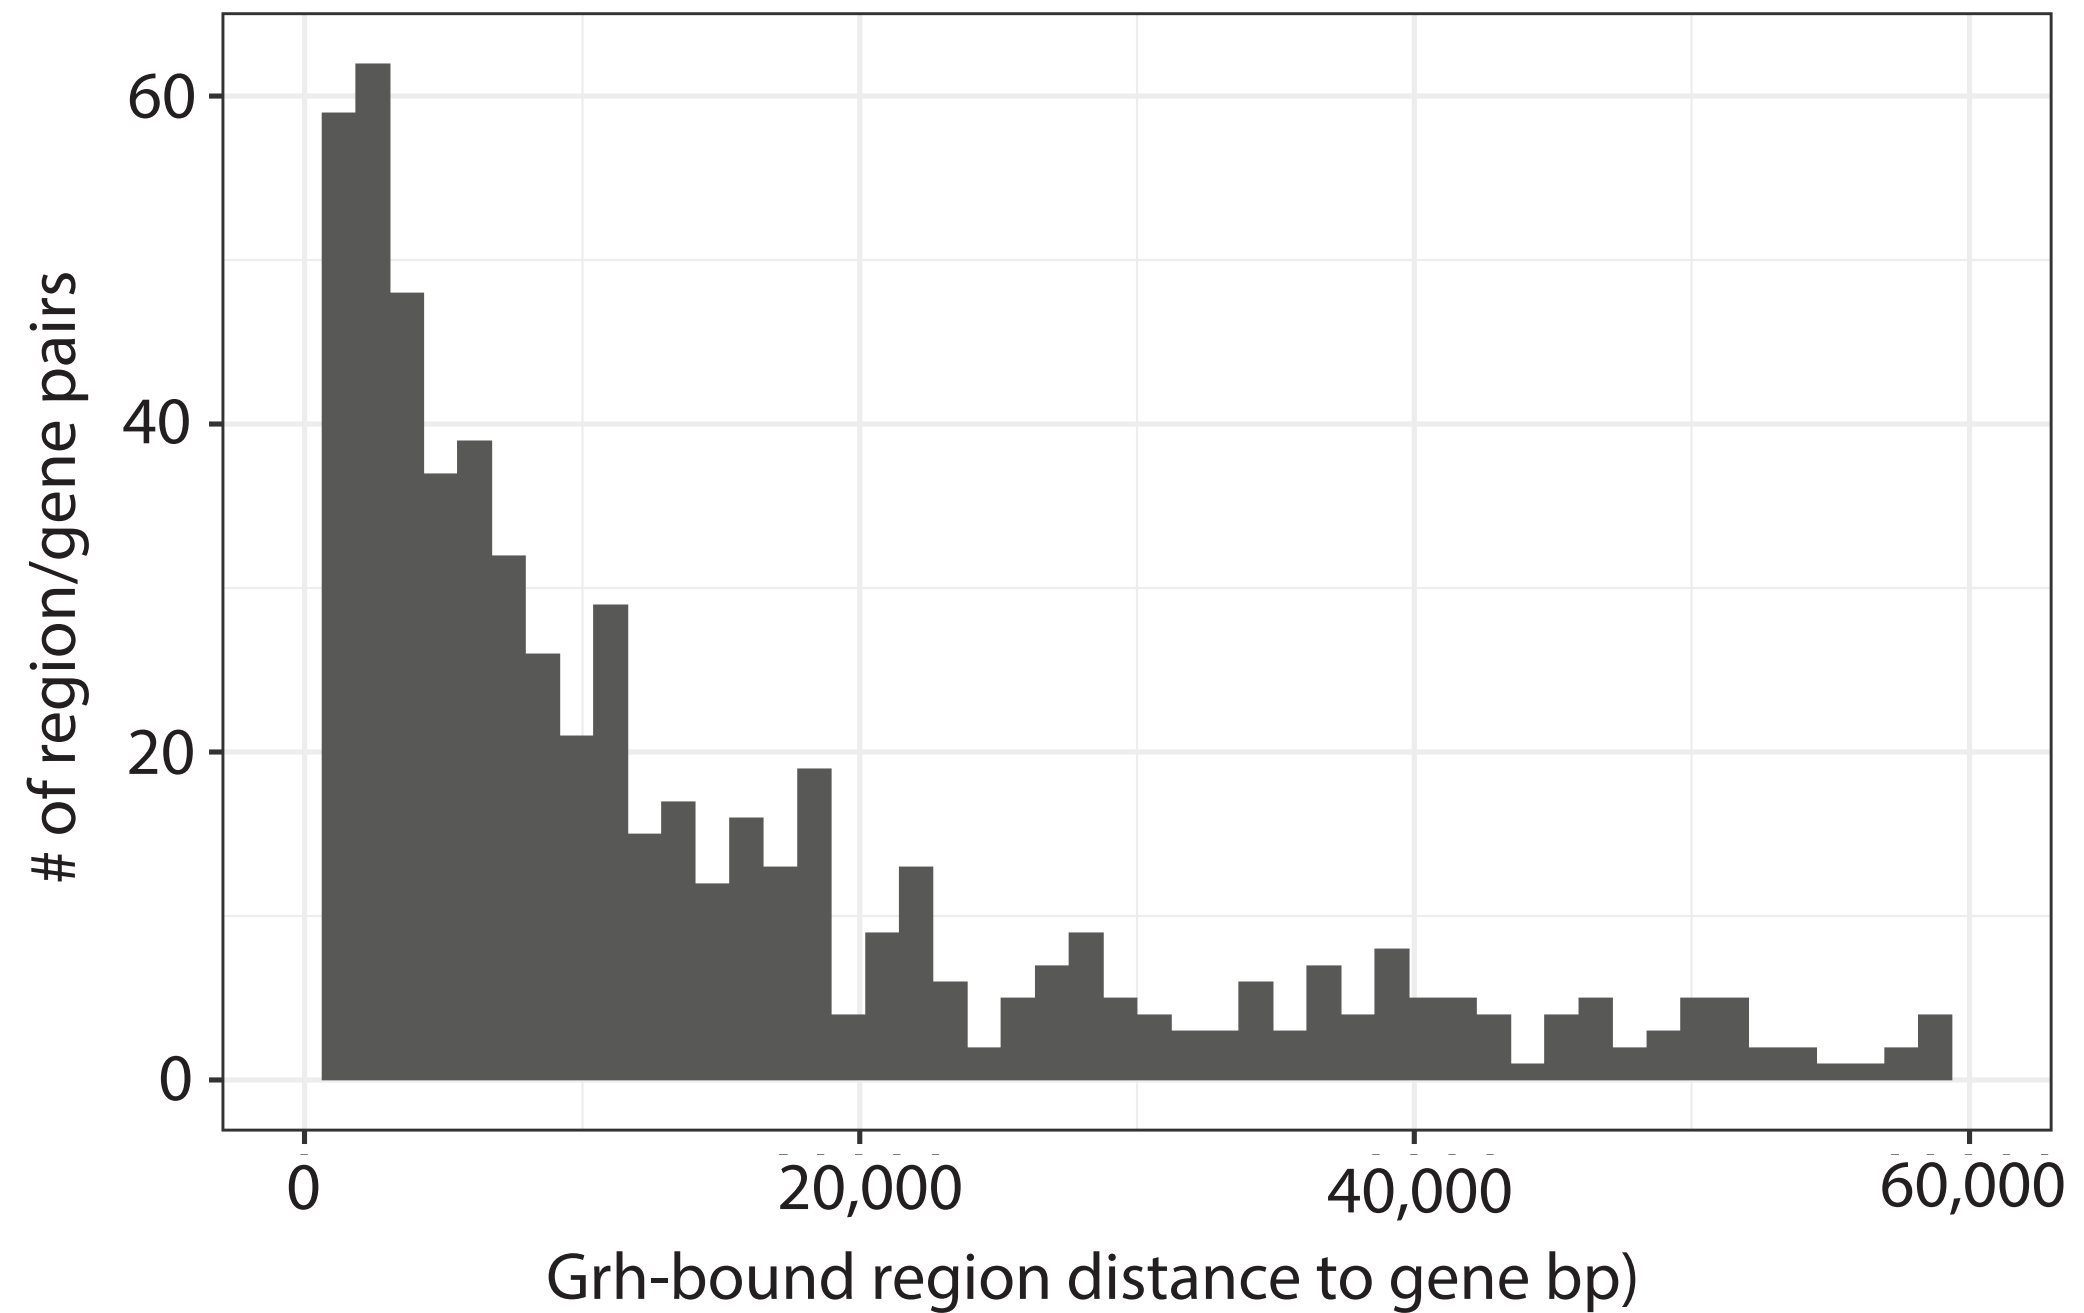

Figure S5. Distribution of distances between matched Grh-bound, accessible regions and expressed genes. For each pair, the distance (x-axis) was calculated by taking the absolute difference between the middle of the region and the transcription start site of the gene.

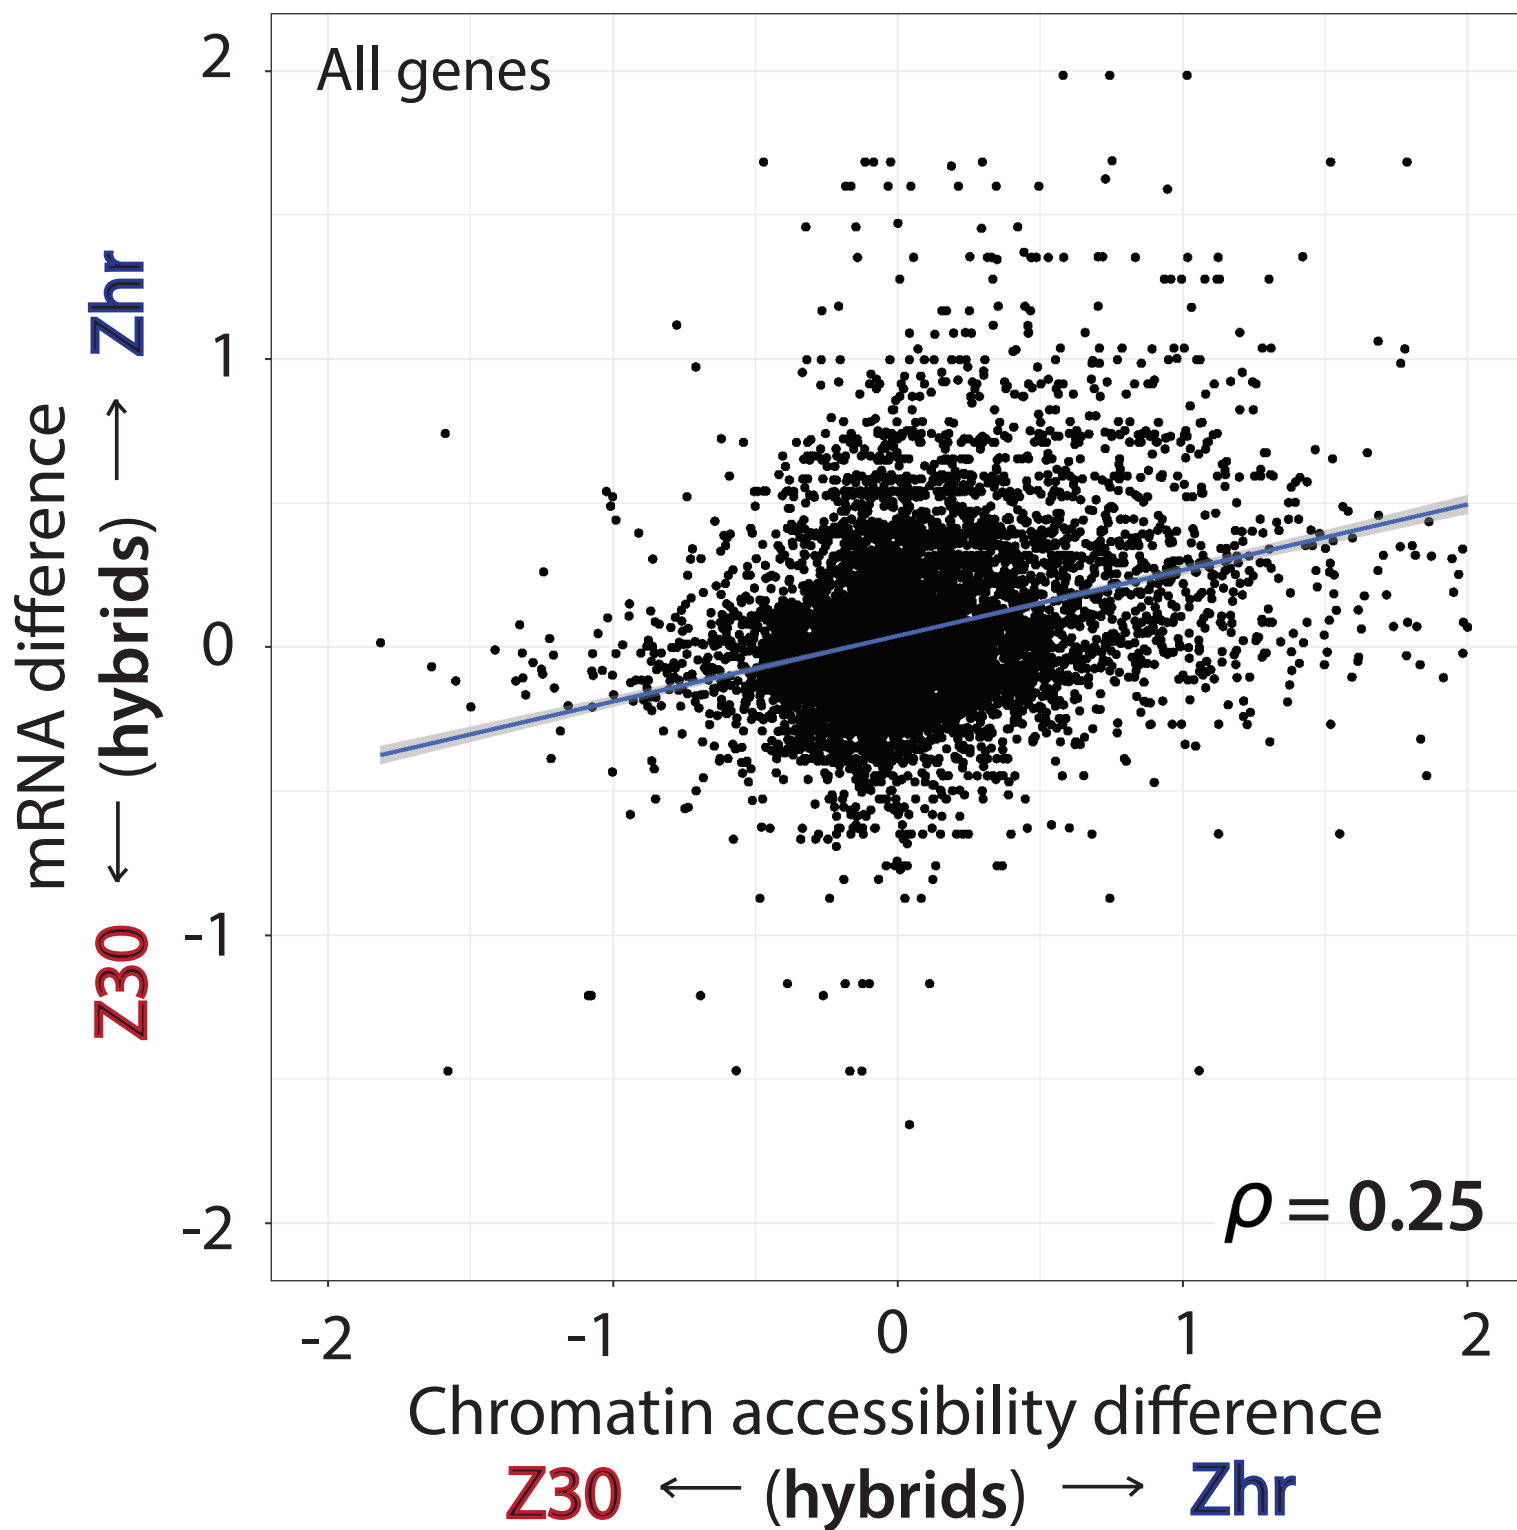

Figure S6. The correlation between variation in chromatin accessibility and gene expression for all genes. For all genes, a scatterplot contrasting the estimated variation in chromatin accessibility between hybrid alleles (x-axis) versus the estimated variation in gene expression between hybrid alleles (y-axis).

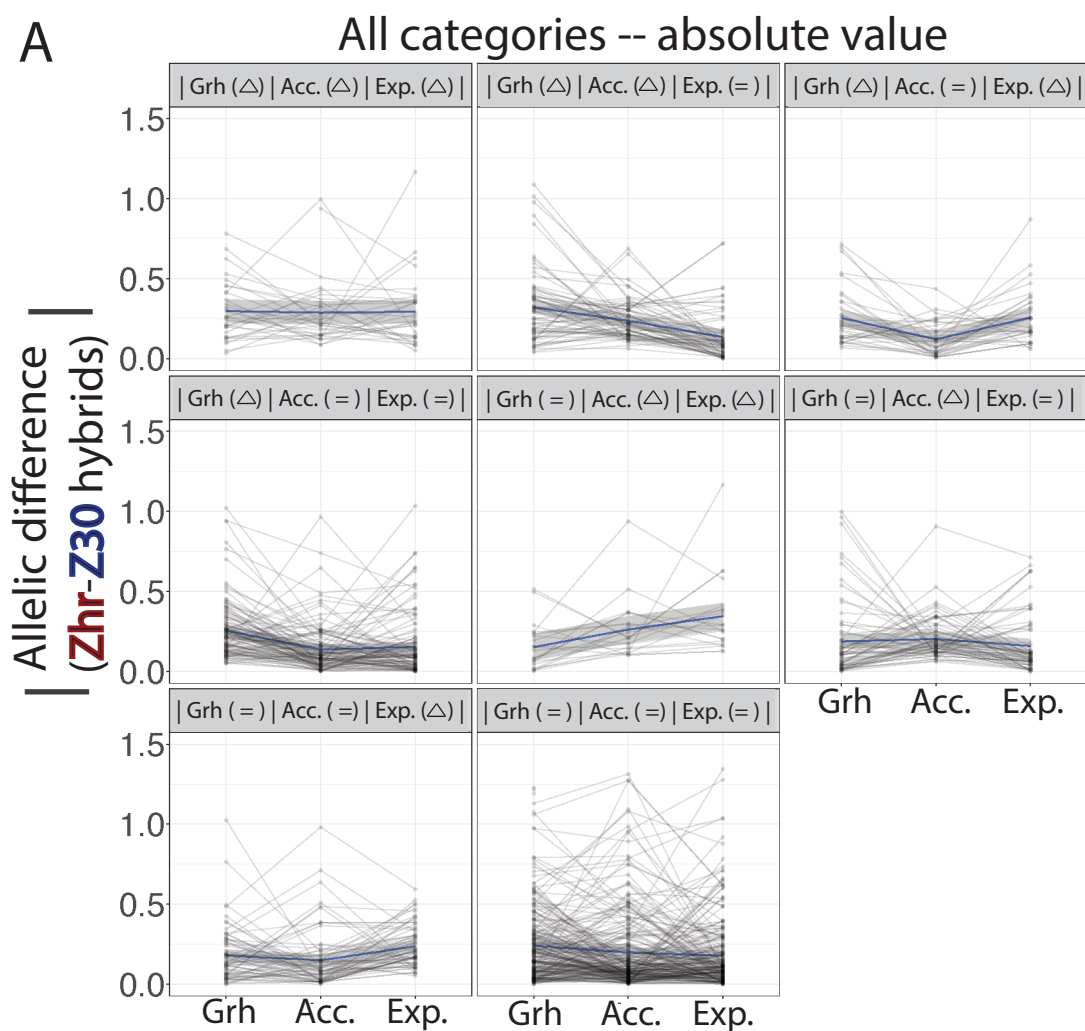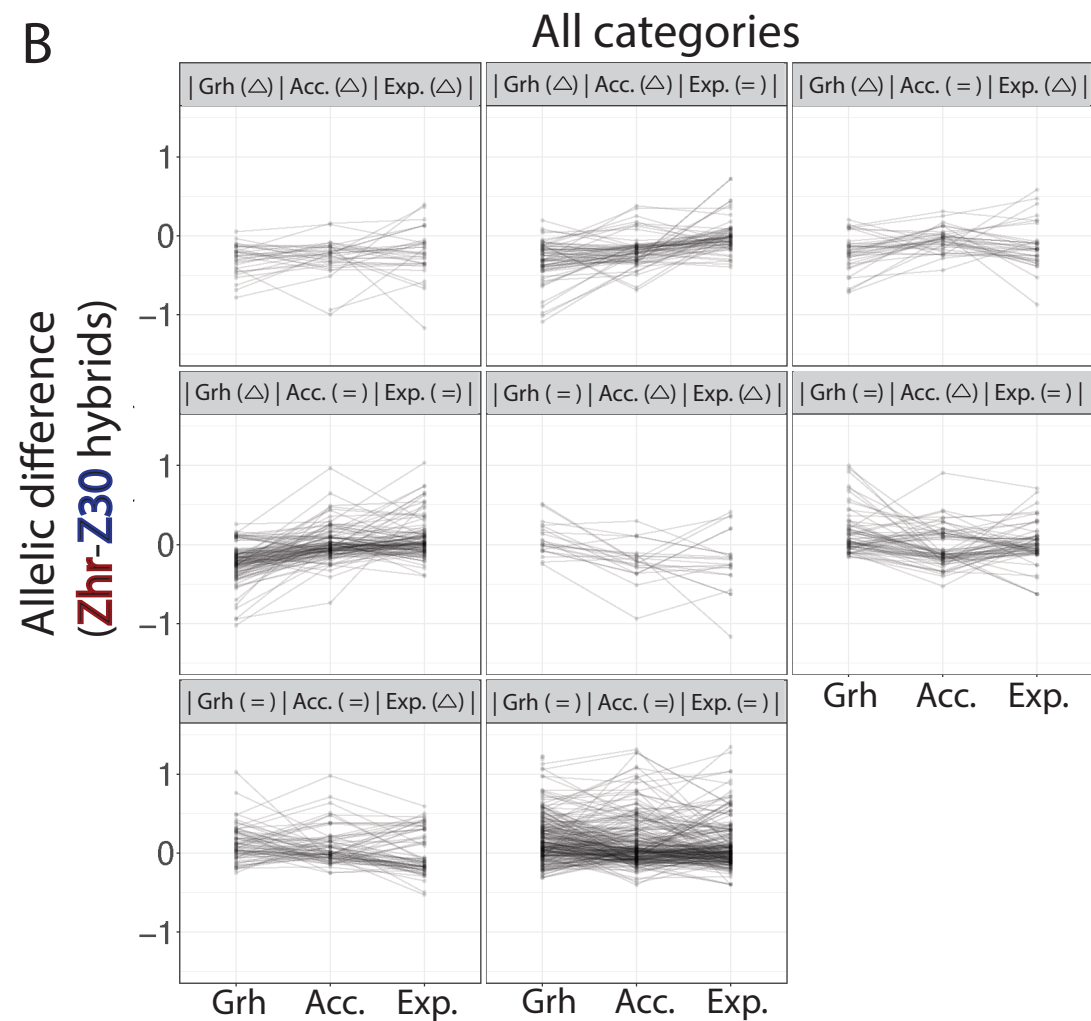

Figure S7. The relationship between variation in Grh binding, chromatin accessibility and gene expression for all gene/region pairs. For all region/gene categories, spaghetti plots of the (A) absolute value and (B) directional value of the estimated gene expression difference between hybrid alleles for Grh binding (Grh), chromatin accessibility (Acc.), and gene expression (Exp.). Loess lines (blue) were fit for each group to summarize the trends.



**A**

**Estimated difference between hybrid alleles (INLA vs DEseq2)**

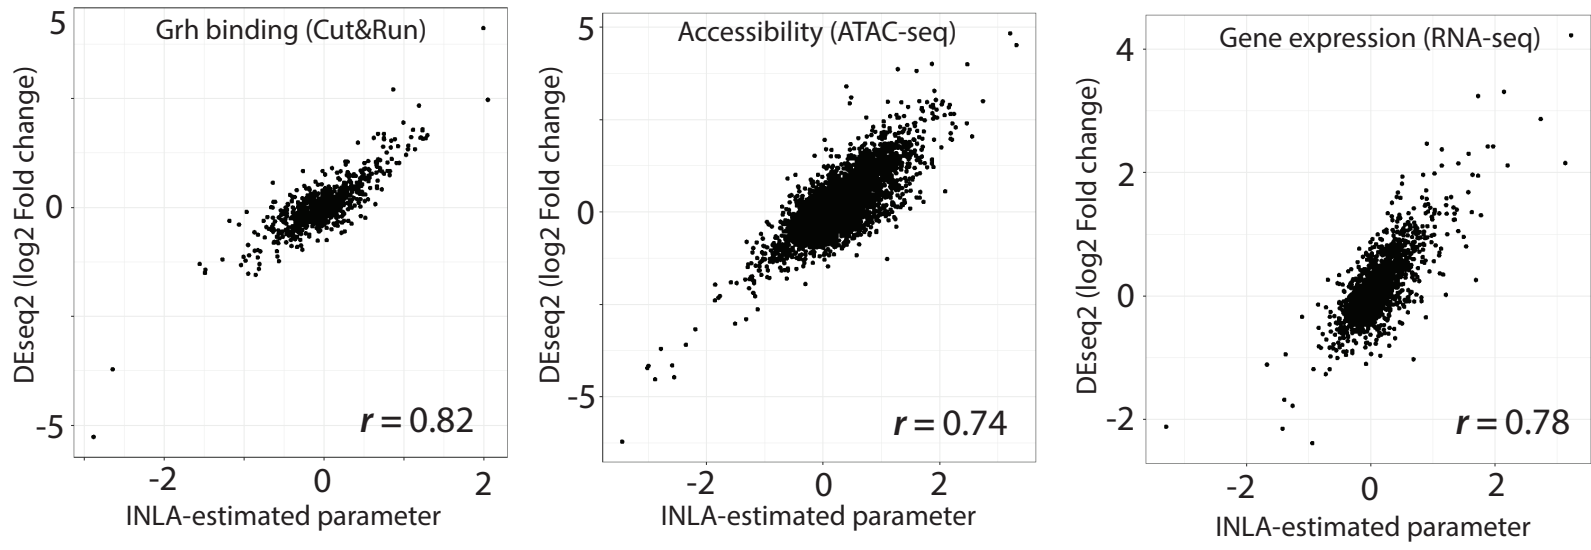

**B**

**Statistical determination of differential binding/accessibility/expression with DEseq2**

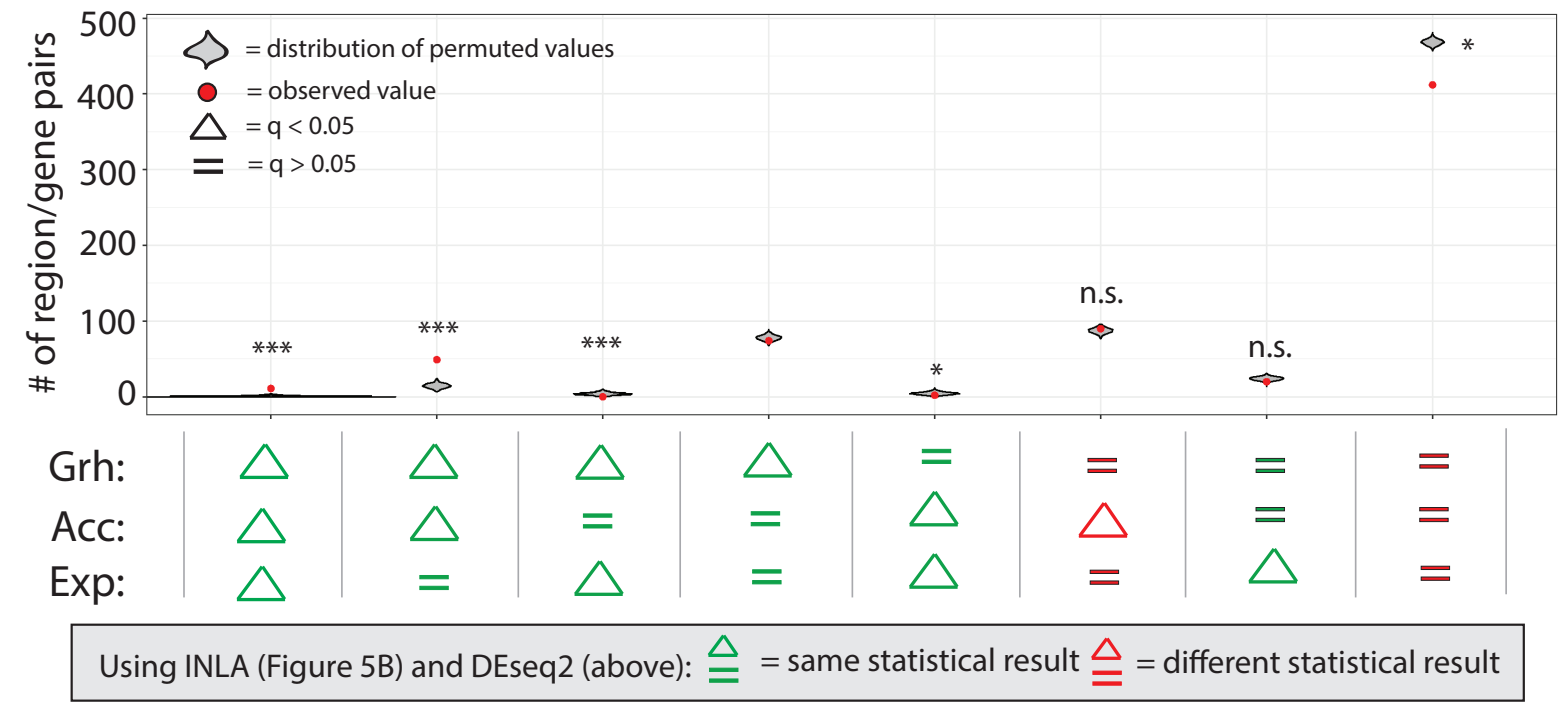

Figure S8. Differential Grh binding, chromatin accessibility, and gene expression analyses repeated using DEseq2. Using DEseq2 with default parameters: (A) Scatterplots contrasting the estimated difference between hybrid alleles with DEseq2 (y-axis) versus that from INLA (x-axis), as used in the main text. Pearson correlation coefficients are provided in the bottom right for each datatype; (B) Permutation tests (as explained in the main text and Figure 5B) using the adjusted p-value output from DEseq2. The agreement/disagreement for significance and directionality between INLA and DEseq2 is indicated below (green = agreement; red = disagreement). \*\*\*:  $q < 0.01$ , \*:  $q < 0.05$ , n.s. = not significant/ $q > 0.05$ .
